# Supplementary material for: Superior Plasticity of Silver-Based Composites with Reinforcing Pyrochlore
Source: MDPI journal article supplement (doi:10.3390/met13020325), 2023-02-06
Supplement: s1 [file s1]

# Superior Plasticity of Silver-Based Composites with Reinforcing Pyrochlore

Lingjie Zhang \*, Weiwei Cai, Ningzhong Bao, Xueyu Geng and Hui Yang

State Key Laboratory of Silicon Materials, School of Materials Science and Engineering, Zhejiang University, Hangzhou 310058, China; caiweiwei88@126.com (W.C.); nzhbao@njtech.edu.cn (N.B.); 22026076@zju.edu.cn (X.G.); yanghui@zju.edu.cn (H.Y.)

\* Correspondence: zhanglingjie@zju.edu.cn

## Supplementary Information

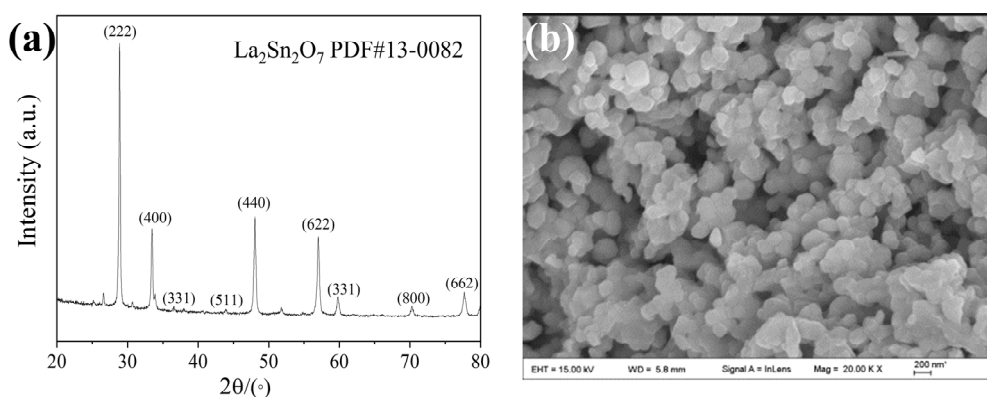

**Figure S1.** (a) XRD pattern and (b) SEM image of the obtained  $\text{La}_2\text{Sn}_2\text{O}_7$  powder.
